# Supplementary material
Source: Springer Nature journal article supplement (https://www.springermedizin.de/resource/supplementary/12885_2006_624_MOESM1_ESM.pdf/9469934)

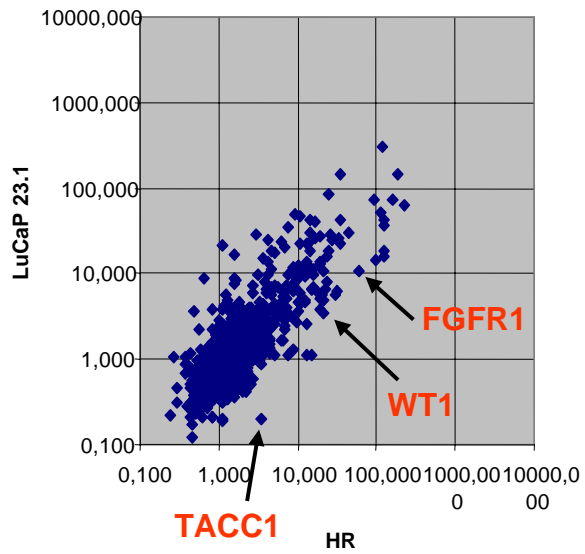

**A**

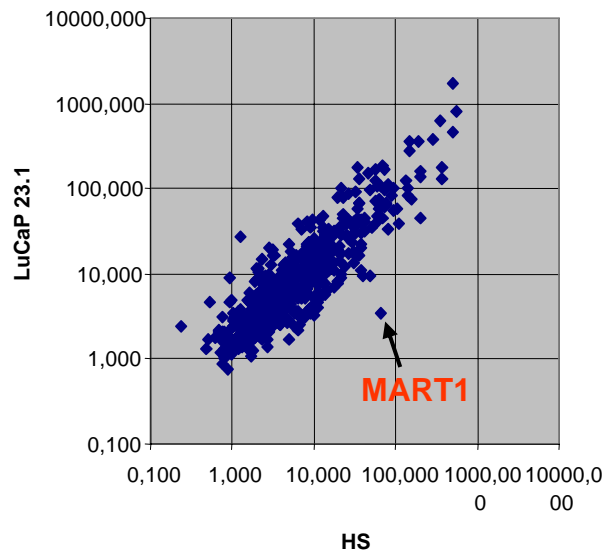

**B**

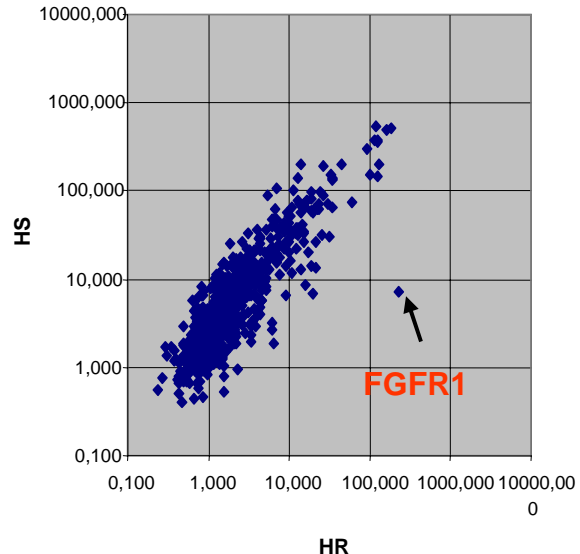

**C**

Supplement: MOESM1 [file 9469934]
